# Supplementary material for: Effect of Thrombin on the Metabolism and Function of Murine Macrophages
Source: MDPI journal article supplement (doi:10.3390/cells11101718), 2022-05-23
Supplement: s1 [file s1]

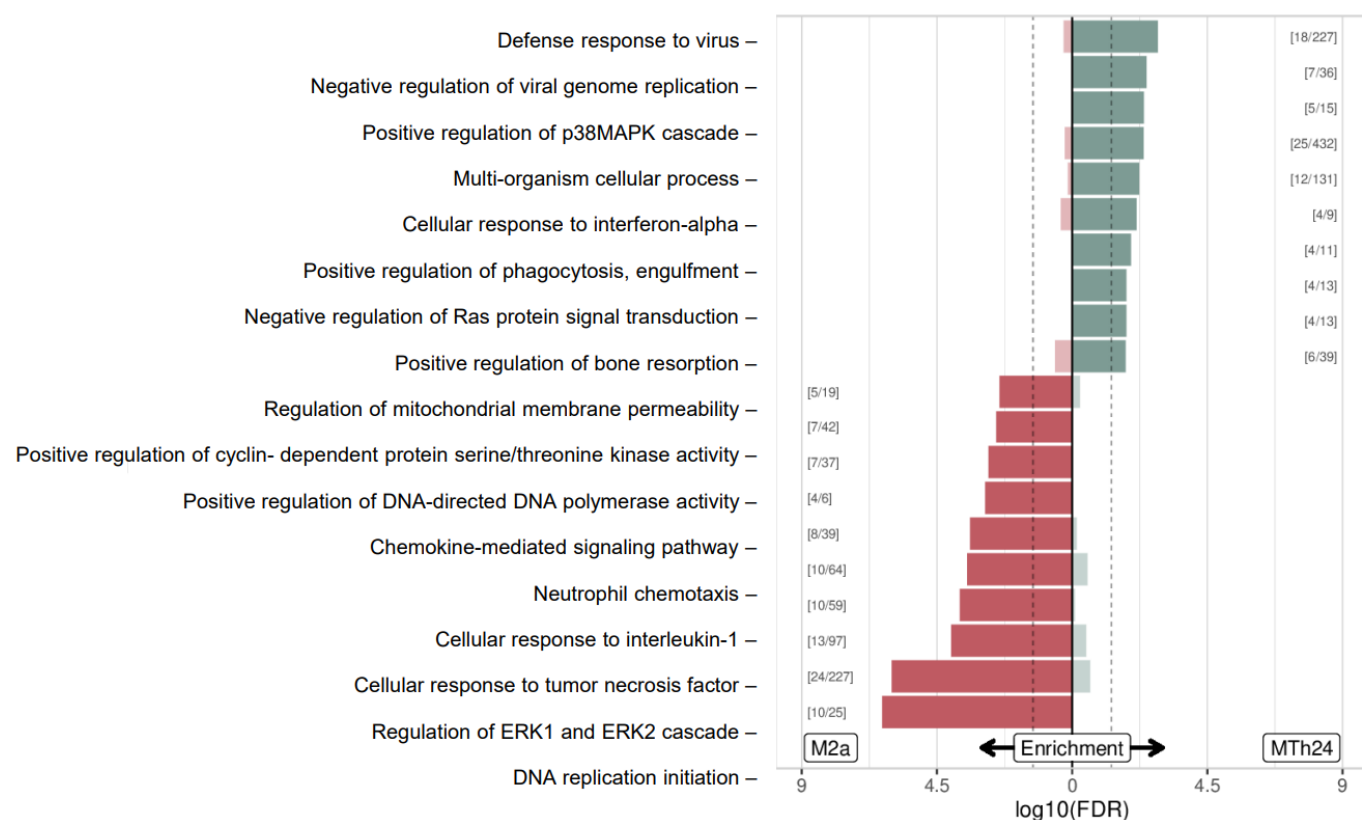

**Figure S1. Thrombin induced changes in macrophage gene expression.** Gene set enrichment analysis for top 10 differentially regulated gene ontology (GO) terms relating to the comparison of murine bone marrow monocyte-derived macrophages polarized to the M2a phenotype or incubated with thrombin (0.1 U/mL, 24 hours).
